# Supplementary material for: Improvement of stomatal resistance and photosynthesis mechanism of Noah-MP-WDDM (v1.42) in simulation of NO 2 dry deposition velocity in forests
Source: Copernicus journal article supplement (doi:10.5194/gmd-2021-157), 2021-06-01
Supplement: Supplementary file [file gmd-2021-157-AC2-supplement.zip]

# Improvement of stomatal resistance and photosynthesis mechanism of Noah-MP-WDDM (v1.42) in simulation of NO<sub>2</sub> dry deposition velocity in forests

Ming Chang<sup>1,\*</sup>, Jiachen Cao<sup>1,\*</sup>, Qi Zhang<sup>2</sup>, Weihua Chen<sup>1</sup>, Guotong Wu<sup>1</sup>, Liping Wu<sup>1</sup>, Weiwen Wang<sup>1</sup>, and Xuemei Wang<sup>1</sup>

<sup>1</sup>Guangdong-Hongkong-Macau Joint Laboratory of Collaborative Innovation for Environmental Quality, Institute for Environmental and Climate Research, Jinan University, China

<sup>2</sup>School of Atmospheric Sciences, Sun Yat-sen University, China

\*These authors contributed equally to this work.

**Correspondence:** Xuemei Wang (eciwxm@jnu.edu.cn)

## Abstract.

~~The rapid~~ Rapid urbanization and economic development ~~of China has~~ in China have led to a dramatic increase in nitrogen oxide (NO<sub>2</sub>) emissions, causing serious atmospheric nitrogen pollution and relatively high levels of nitrogen deposition. However, despite the importance of nitrogen deposition, dry deposition processes in forested areas are still insufficiently represented in current global and regional atmospheric chemistry models, which constrains our understanding and prediction of spatial and temporal patterns of nitrogen transport in forest ecosystems in South China. The offline 1-D community Noah land surface model with multi-parameterization options (Noah-MP) is coupled with the WRF-Chem dry deposition module (WDDM) and is applied to further understand and identify the key processes that affect forest canopy dry deposition. The canopy stomatal resistance mechanism and the ~~nitrogen-limitings~~ nitrogen-limiting scheme for photosynthesis in Noah-MP-WDDM are modified to improve the simulation of reactive nitrogen oxide dry deposition velocity. This study finds that the combined improved stomatal resistance mechanism and ~~nitrogen-limitings~~ nitrogen-limiting scheme for photosynthesis (BN-23) agrees better with the observed NO<sub>2</sub> dry deposition velocity, with mean bias reduced by 50.1%, respectively. At the same time, by comparing the different mechanisms of the two processes of canopy ~~stoma~~ stomatal resistance and leaf nitrogen-limiting factors, this study also finds that the diurnal changes in dry deposition velocity simulated by each regional model present four sets of distributions. This is mainly due to the different ways that each integrated mechanism handles the opening and closing of stomata at noon and the way the nitrogen-limiting factor acts.

*Copyright statement.* Author(s) 2020. CC BY 4.0 License.

# 1 Introduction

Transport and deposition of nitrogen-containing compounds is one of the most critical processes in the study of biogeochemical cycles (Gruber and Galloway, 2008). Atmospheric nitrogen deposition is not only the main way that atmospheric reactive nitrogen is removed, but is also an important source of nitrogen for ecosystems (Jefferies and Maron, 1997; Horii et al., 2005). Nitrogen deposition affects changes in the carbon sink in forest ecosystems by affecting plant growth and death (De Vries et al., 2009; Bernhard, 2012). An increase in nitrogen deposition will cause an increase in litter and a decrease in soil decomposition, which will increase the carbon fixation of the soil (Stevens et al., 2004; Liang et al., 2020). Meanwhile, soil acidification caused by nitrogen deposition will reduce the number of microorganisms in the soil, reduce the production of methane, cause the degradation of peatland, and jointly affect the balance of greenhouse gases and the climate (Xu et al., 2009; Cui et al., 2010; Seinfeld and Pandis, 2012; Erisman et al., 2014). At present, studies have shown that there has been a sharp rise in global and regional atmospheric nitrogen deposition, which exceeds the critical load of local ecosystems in many regions (Liu et al., 2013; Yu et al., 2019).

In order to evaluate the impact of atmospheric nitrogen dry deposition on ecosystems, it is important to accurately estimate the dry deposition fluxes of nitrogen components (Wu et al., 2011, 2012; Tian et al., 2018). Scholars calculate the dry deposition velocity of nitrogen-containing components or estimate the effect of variation on dry deposition flux based on the global or regional numerical models (Phillips et al., 2006; Zhao et al., 2017; Han et al., 2017; Zhong et al., 2020). The biased results of nitrogen deposition from modelling compared to those from observations range from -70% to 800% (Chang et al., 2020a). Part of the estimated deviation-uncertainty comes from the input bias in the nitrogen emission inventory input-bias in the model simulation. For example, Galloway et al. (1994) predicted the nitrogen deposition pattern for 2020, and a large deflection area appeared in an area where emissions did not increase as expected. Another part of the deviation-uncertainty comes from the inaccurate simulation of nitrogen concentration. In this situation, the simulated concentration can be verified and nudged by measuring stable oxygen and nitrogen isotope ratios (Guerrieri et al., 2020). At the same time, the simplification and biases from of the deposition mechanism in the models can-not-be-ignored compared with satellite retrievals cannot be ignored (Liu et al., 2020). Deposition velocity is difficult to measure and is affected by many coupled physical, chemical, and biological processes occurring at the deposition interface.

Therefore, the resistance-velocity method, which is similar to Ohm's law, is used to calculate the dry deposition velocity of various atmospheric species between the surface and the atmosphere atmosphere and the land surface (Szinyei, 2015). In this method, the dry deposition velocity ( $V_d$ ) of gaseous matter is expressed as the reciprocal of the total resistance ( $R_t$ ) of the process of atmospheric pollutant deposition to the atmospheric pollutants' deposition process to the land surface. The total resistance is determined by aerodynamic resistance ( $R_a$ ), quasi-laminar boundary layer resistance ( $R_b$ ), and canopy resistance ( $R_c$ ). Their relationship is generally characterized by Eq. 1.

$$V_d = \frac{1}{R_t} = \frac{1}{R_a + R_b + R_c} \quad (1)$$

50 Here,  $R_a$  is calculated by ~~the~~ micrometeorological parameters, which depend mainly on local atmospheric turbulence intensity, while  $R_b$  is driven by the diffusion coefficient and air viscosity of gaseous matter. The calculation of these two resistances ~~is basically similar in different deposition resistance mechanisms~~ mechanisms follows similar principles (Finnigan, 2000). At present, the treatment of dry deposition processes affected by turbulent diffusion in numerical models includes two parts: one is the turbulent diffusion process from the bottom of the atmospheric boundary layer to the canopy, and the other is the turbulent  
55 exchange process inside the canopy (Flechard et al., 2011, 2013).

The calculation of  $R_a$  is usually based on the turbulent transport part of the land surface model. Most current models are based on the near-surface-layer similarity theory, which first calculates the surface roughness and zero plane displacement, and then calculates the turbulent transport coefficient according to the flux gradient relationship under different stratifications (Makar et al., 2017). The calculation of turbulent exchange inside the canopy is more complex ~~and~~ and is highly related to the  
60 structure of the vegetation canopy and other local properties (Finnigan et al., 2009). Some forest fire models are based on the measured empirical wind speed profiles in the canopy, and other models use the assumption of neutral stratification to solve the turbulent flow fields of the canopy, such as SSiB, SVAT, ~~and~~ BATS, etc. (Yongjiu and Qingcun, 1997; Yang and Friedl, 2003; Falge et al., 2005; Moon et al., 2019).

Furthermore, the calculation of  $R_c$  is more complicated and diverse than that of  $R_a$ , because  $R_c$  is closely related to  
65 ~~difference~~ differences in the underlying surface, vegetation, soil, and other conditions (Wu et al., 2018). Due to different ~~considerations of in~~ the underlying surface,  $R_c$  is usually further decomposed based on canopy type, canopy structure, surface properties of deposition receptors, biochemical reactions of deposition materials, mesophyll uptake, and other canopy processes (~~Massad et al., 2020~~) (Ganzeveld et al., 2002; Wolfe and Thornton, 2011; Simpson et al., 2012; Delaria and Cohen, 2020; Massad et al., 2020).  
For the surface of the vegetation canopy, models are refined to consider the resistance of the stomata, mesophyll, epidermis,  
70 soil, and other canopy surface factors (Dai et al., 2004; Massad et al., 2020). For example, ~~the a~~ multi-layer forest canopy model is used to calculate the canopy stomatal resistance layer by layer at monitoring sites in the Clean Air Status and Trends Network (CASTNET) (Li et al., 2016). As a counterexample, the ocean, which was thought to be a relatively simple surface, has evolved from consideration of smooth levels to sea surface fragmentation, different particle humidities, and other factors (Schulz et al., 2012). However, our current understanding of the exchange of nitrogen oxides between the atmosphere and bio-  
75 sphere remains incomplete ~~(Delaria and Cohen, 2020)~~ (Delaria and Cohen (2020) proves the importance of NO<sub>2</sub> dry deposition and demonstrates that NO<sub>2</sub> deposition can provide a mechanistic explanation for the canopy reduction of NO<sub>x</sub>, which has been ignored or unexplained by current common land surface models. For instance, the possible existence of ~~a an~~ NO<sub>2</sub> compensation point toward the leaf surface in forests has been controversial as a result of experimental comparison (Wang et al., 2020). At the same time, Delaria et al. (2018)'s work found that the hypothesis of a nitrogen compensation point may be a  
80 problem caused by not adopting a direct NO<sub>2</sub> measurement technique. And the interferences from alkenes or other reactions of biogenic volatile organic compounds may enhance the observed NO<sub>2</sub> compensation point and suppress the deposition velocity (Delaria et al., 2018; Place et al., 2020). This will likely lead to changes in our traditional treatment of the parameterization of nitrogen exchange in the model. The coupling of canopy photosynthesis, nutrient stress, ~~the~~ impact of mesophyllic processes,

and other plant physiological processes is still poorly resolved in the field of dry deposition model improvement (Massad et al., 2020).

In this study, we apply different improved stomatal resistance mechanisms and nitrogen limitations on photosynthesis mechanisms to the Noah-MP model coupled with dry deposition schemes to explore changes in nutrient stress in stomatal conductance and evaluate the consequences of these changes on  $\text{NO}_2$  dry deposition velocity. This paper is organized as follows: besides this introductory Sect. 1, Sect. 2 presents a full description of the improved stomatal resistance mechanisms and different schemes of nitrogen limitation of photosynthesis. Sect. 3 includes model evaluation and discussion about the influence on  $\text{NO}_2$  dry deposition velocity simulation, the respective path of canopy stomatal and photosynthesis processes and the sensitivity of major parameters. Finally, a conclusion and a future research plan for the Noah-MP-WDDM framework are summarized in Sect. 4.

## 2 Model Description and Configuration

### 2.1 Base Model Setup

This study uses the coupled single-point (1-D) Noah-MP model and the WRF-Chem dry deposition module (WDDM) as the base model (Noah-MP-WDDM) which was developed by Zhang et al. (2017). In order to reduce the effect of meteorological simulation biases on  $V_d$  simulation, the micro-meteorological observation test datasets of Zhang et al. (2017) are used to drive this dry deposition single-point (1-D) Noah-MP-WDDM model and all improvements. However, it is worth noting that when this single-point simulation is upscaled to a regional or global model, it may bring more uncertainty due to the scale conversion. In addition, all the land surface parameters used in this study are the default parameters inside the Noah-MP land surface model's look-up tables (VEGPARM.TBL, SOILPARM.TBL, and MPTABLE.TBL). This may cause systematic uncertainties in the overall modelling. The observation data were obtained at the Dinghushan Forest Ecosystem Research Station (Fluxnet Site Code: CN-Din,  $23^\circ 10' 24''\text{N}$ ,  $112^\circ 32' 10''\text{E}$ , altitude 300m). The  $\text{NO}_2$  concentration was measured using the Model T200 (Teledyne-API, USA)  $\text{NO}_2$  analyzer (Zhang et al., 2017).

Physical processes related to snow, permafrost, and other factors—like Supercoiled Liquid Water in Frozen Soil (FRZ), Frozen Soil Permeability (INF), Snow Surface Albedo (ALB), Partitioning Precipitation into Rainfall and Snowfall (SNF), Lower Boundary of Soil Temperature (TBOT), and Snow/Soil Temperature Time Scheme (STC) have only play—have only a small effect on  $V_d$  because Dinghushan is located in the subtropics. So these physical parameterization schemes all use option 1, the default option (Niu, 2011). In contrast, the other six physical parameterization schemes—Dynamic Vegetation Model (DVEG); Canopy Stomatal Resistance (CRS); Soil moisture factor for stomatal resistance,  $\beta$  Factor (BTR); Runoff and Groundwater (RUN); Surface Exchange Coefficient for Heat,  $C_H$  (SFC); and Radiation Transfer (RAD)—have a great influence on  $V_d$  simulation. Their respective options are the dynamic vegetation option (opt\_dveg=2, -), Ball-Berry canopy stomatal resistance option (opt\_crs=1, -), BATS soil moisture factor option (opt\_btr=3, -), original surface and subsurface runoff option (opt\_run=3, -), original Noah surface layer drag coefficient option (opt\_sfc=2, and -), and two-stream applied to grid-cell radiation transfer option (opt\_rad=2) in the above physical parameterization schemes (Chang et al., 2020b) (Niu, 2011; Chang et al., 2020b).

## 2.2 Coupling of Stomatal Resistance Schemes

Previous studies have generally used the Jarvis stomatal conductance model, which is based on environmental factors such as photosynthetic effective radiation, temperature, humidity, and soil water to calculate canopy stomatal resistance (Jarvis, 1976). Compared with Jarvis, the Ball-Berry stomatal conductance model (Ball et al., 1987) ~~is a better mechanism for the stomatal resistance of the canopy; it~~ calculates the stomatal resistance based on the through-canopy photosynthesis rate,  $CO_2$  concentration, and humidity on the leaf surface as shown in (2). This type of mechanism requires a coupled photosynthesis model to calculate or observe the photosynthesis rate of the canopy, and the photosynthesis model depends on the setting of many ~~key~~ plant physiological parameters (such as optimal photosynthesis efficiency, catalytic enzyme activity parameter Q10, etc.). It is worth noting that these parameters are often inaccurate at the regional scale, which brings some uncertainty (Dai et al., 2019; Fisher and Koven, 2020).

Although the Ball-Berry type stomatal resistance scheme behaves very similarly to the Jarvis type in modeling transpiration, the former scheme allows a direct coupling of terrestrial water and carbon fluxes and improves the simulation of vegetation-atmosphere interactions (Niyogi et al., 2009; Yang et al., 2011). The Noah-MP model sets the stomatal conductance slope of the Ball-Berry mechanism as a constant, which is not suitable and will cause a large simulation bias. Therefore, we integrate observational experimental results, statistical fitting or plant physiological model equations in photosynthesis, stomatal conductance, and other aspects of plant physiology in this study, by writing the equation as a subroutine subroutines and adding to the calling tree in the coupled single-point Noah-MP-WDDM model.

The calculation equation is Ball et al. (1987) as follows:

$$\frac{1}{R_s} = m \times \frac{A}{C_{air}} \times \frac{e_{air}}{e_{sat}(T_v)} \times P_{air} + g_{min} \quad (2)$$

Where  $m$  is the slope of the stomatal conductance,  $A$  is the photosynthetic rate,  $C_{air}$  is the  $CO_2$  concentration on the leaf surface,  $e_{air}$  is the vapor pressure on the leaf surface,  $sat(T_v)$  is the saturated vapor pressure of the leaves at the canopy temperature,  $P_{air}$  is the surface pressure, and  $g_{min}$  is the minimum stomatal conductance.

In addition, the non-stomatal resistance ( $R_{ns}$ ) calculated in Noah-MP is according to (Zhang et al., 2003):

$$\frac{1}{R_{ns}} = \frac{1}{R_{ac} + R_g} + \frac{1}{R_{cut}} \quad (3)$$

where  $R_{ac}$  is the in-canopy aerodynamic resistance, which is common to all gases, and  $R_g$  and  $R_{cut}$  are the resistances for the uptake by the ground/soil and canopy cuticle. Similar to the work of Wesely (1989),  $R_g$  and  $R_{cut}$  are parameterized for  $O_3$  from look-up tables.

The equations integrated into the single-point mechanism model are shown in Table 1, where

- MBM-1 (Modified Ball-Berry Mechanism, MBM) is the stomatal conductance equation of the default Ball-Berry equation, and the main parameter used is the slope of the Ball-Berry conductance relationship and the minimum stomatal conductance ( $g_{min}$ );

- Leuning (1990) introduced a  $CO_2$  compensation point  $\Gamma$  to improve the Ball-Berry equation so that it can simulate the net photosynthetic rate and stomatal conductance when the  $CO_2$  concentration on the blade surface is equal to the compensation point (Table 1, MBM-2). ~~Later, And~~ the method of Lohammar et al. (1980) was adopted to replace  $RH$  with the water vapor saturation function  $f(D)$  ~~(Table 1, MBM-4). These equations have~~ while its equation has been applied to a variety of plant physiological models (Leuning, 1995) (Table 1, MBM-4);
- Aphalo and Jarvis (1993) separated the effects of temperature and water vapor difference  $D$ , which more directly ~~reflected~~ reflects the effect of temperature on stomatal conductance than the original Ball-Berry equation (Table 1, MBM-3);
- Yu et al. (2004) measured stomatal conductance of wheat under normal atmospheric and artificially increased  $CO_2$  concentration, as well as the response curve of photosynthesis to light and  $CO_2$  concentration. Based on this, researchers constructed an equation reflecting the physiological response of plants, which could reflect the relationship between stomatal conductance and photosynthesis rate (Table 1, MBM-5);
- Ye and Yu (2008) derived a model of leaf stomatal mechanism based on experimental observation of light response and stomatal conductance data, which can better simulate the relationship between stomatal conductance and photosynthetic rate (Table 1, MBM-6);
- Medlyn et al. (2011) introduced the optical contract rate coefficient  $g_1$  (Table 1, MBM-7), which led to better simulation results in models such as CABLE (De Kauwe et al., 2014).

### 165 2.3 Improvements in Nitrogen-Limiting Schemes for Photosynthesis

The combination of the DVEG mechanism and the Ball-Berry model can comprehensively consider the interaction between photosynthesis rate and canopy stomatal ~~impedance~~ resistance. This is physiologically significant in that it balances the supply and demand of  $CO_2$  in the chemical reaction of photosynthesis, so as to maintain a reasonable concentration of  $CO_2$  in the mesophyll tissue. However, at the vegetation canopy scale, the photosynthetic rate is also related to the nitrogen content of leaves. Currently, the commonly used biogeochemical models usually express the effect of nitrogen on the photosynthetic process based on the relevant theory of nitrogen limitation, but they often simplify it (Li et al., 2013).

In this study, the original DVEG mechanism of Noah-MP set the nitrogen limitation factor of leaves  $f(N)$  as a function of leaf nitrogen concentration ( $C_N^{leaf}$ ) and the maximum nitrogen concentration parameters (FOLNMX) of this vegetation type ( $f(N) = C_N^{leaf} \cdot FOLNMX^{-1}$ ). However,  $C_N^{leaf}$  and FOLNMX were set as two constants which is obviously an over-  
simplification for land surface simulation in a large area (Bonan, 1995). For different types of plants, the nitrogen content in leaves should make a significant difference in photosynthetic nitrogen utilization efficiency (Zheng and Shanguan, 2007). For regional nitrogen deposition simulation, it is obviously inappropriate to simplify the nitrogen-limiting process in leaves, so a more accurate description of the effect of nitrogen on plant photosynthesis and a more accurate estimation of the effect of nitrogen deposition on the whole forest ecosystem are needed.

180 According to whether the nitrogen content of plant tissues is directly taken as the variable in the equation, the current expressions of how nitrogen affects photosynthesis (as shown in Table 2) can be divided into implicit and explicit expressions:

– Implicit

For the photosynthetic rate model calculated by the Farquhar Model (Farquhar et al., 1980), the photosynthetic rate is determined by the minimum value of carboxylation efficiency ( $W_c$ ), carboxylation efficiency ( $W_j$ ) and organophosphorus carboxylation efficiency ( $W_e$ ), which is limited by the concentration of chlorophyll photoenzyme (Rubisco), in which  $W_c$  and  $W_e$  are proportional to the maximum carboxylation rate ( $V_{cm}$ ).  
185

Therefore, the effect of nitrogen on photosynthesis,  $V_{cm}$ , is reflected mainly in the limitation of  $f(N)$ . As mentioned above,  $f(N)$  was set by two constants in the DVEG dynamic vegetation process mechanism. In addition, models such as AVIM (Ji, 1995), CLM4.0 (Oleson et al., 2010) and Noah-LSM (Bonan, 1995) also directly take  $f(N)$  as a parameter, ranging from 0.5 to 1 (Table 2, MNM-1, (Modified Nitrogen Mechanism, MNM)).  
190

However, BEPS (Liu et al., 1999), DLEM (Tian et al., 2010), IBIS (Liu et al., 2005), InTEC (Chen et al., 2000) and other models use the ratio of the optimal carbon-nitrogen ratio ( $B_{Vmax}$ ) to the simulated actual carbon-nitrogen ratio ( $B_L$ ) to represent  $f(N)$  (Table 2, MNM-2).

Models that calculate photosynthesis processes based on empirical functions (such as CASA (Friedlingstein et al., 1999), Lin(Lin et al., 2000), PnET(Aber and Federer, 1992), TEM(McGuire et al., 1997), TRIPLEX (Peng et al., 2002), and 3-PG (Landsberg and Waring, 1997), etc.) ~~use mostly~~ mostly use the form of vegetation productivity, which is proportional to light interception, to calculate the primary productivity (NPP) or total primary productivity (GPP) (~~Monteith, 1972; Monteith and Moss, 1977) of vegetation~~ of vegetation (Monteith, 1972; Monteith and Moss, 1977). Such models generally use implicit methods to limit GPP or NPP, so as to implicitly limit the calculation of photosynthesis rate, thus affecting canopy stomatal conductance (Table 2, MNM-3, MNM-4).  
195  
200

– Explicit

The explicit method is in direct accordance with plant physiology experiments to establish the relation between the  $V_{cm}$  and  $c_N$  functions, and leaf nitrogen content can be measured more directly in the plant physiology sense in relation to photosynthesis. Different researchers get different function relations, so there is no unified explicit expression of the equation:  
205

For example, in Biome-BGC (Thornton et al., 2002),  $V_{cm}$  is calculated by the carbon and nitrogen ratio ( $C : N_{leaf}$ ), the ratio of the Rubisco enzyme middle nitrogen content to total leaf nitrogen content ( $f_{nr}$ ), specific leaf area index ( $SLA$ ), etc. (Table 2, MNM-5);

Doly and CEVSA established a functional relationship between light saturation rate ( $A_b$ ) and leaf nitrogen absorption rate ( $n$ ) (Woodward et al., 1995; Cao and Woodward, 1998)(Table 2, MNM-6).  
210



## 2.4 Mechanism Comparison-Experiment Setup for Mechanism Comparison

After integrating all the improved equations of the canopy stomatal resistance mechanism and the nitrogen-limiting schemes for photosynthesis into the single-point model in the form of subroutines, an orthogonal experimental scheme (Table ??) was adopted to simulate them, and all the experimental schemes were driven by the same meteorological forcing data.

215 The code names of each simulation experiment are shown in Fig. 2 in which the original Noah-MP-WDDM model from Zhang et al. (2017) is named BN-11. Since all the mechanisms can be combined into 42 combinations, the current version number is set at v1.42 in this study.

## 3 Results and Discussion

### 3.1 Model Validation

220 To evaluate the applicability of the single-point Noah-MP-WDDM dry deposition model and all its improvements, we compared the base model results (BN-11) to the observations of latent heat (LH) and sensible heat (SH) fluxes. Detailed statistics of the comparison are shown in Table 3. It can be seen that the simulation of average SH is overestimated by about  $20 W \cdot m^2$  while the average LH is underestimated by about  $0.1 W \cdot m^2$  compared with observations. The models perform reasonably well for most simulations, with uncertainties within a factor of  $0.5 \sim 2$  (Fig. 1).

### 225 3.2 Performance of $V_d$ Simulation with Different Mechanisms

The model simulation show-shows obvious underestimation of  $V_d$ . The simulated average  $V_d$  is about a quarter of the observed results. And the correlation coefficient is very low and basically cannot reflect the trend characteristics (Fig. 2). On the one hand, the Noah-MP-WDDM model itself has a poor ability to simulate the change trend of deposition. On the other hand, it is also affected by too much precipitation in subtropical regions, poor quality control of dry deposition observation data and many missing values (Zhang et al., 2017). The observation instrument was limited by the conditions surrounding the flux tower, and the assayed gas had accumulated (especially at night) in the reaction chamber, resulting in a partial (nocturnal) high observed value(Zhang et al., 2017).

It can be seen from Fig. 2 that the simulation effect of each model mechanism is relatively poor, especially for all the combinations corresponding to the MBM-5, MBM-6, MBM-7, and MNM-5 series; the simulated  $V_d$  in these series is basically concentrated around  $0.05 \text{ cm/s}$ . This indicates that the stability of the parameterization of these series of mechanisms is relatively high, and the disturbance caused by different schemes in other processes is suppressed.

There is a magnitude difference between the results of the simulation and the observed  $V_d$ , which may be because these mechanisms are not supported with some coniferous species because conifers have little direct stomatal response to elevated  $CO_2$  (Medlyn et al., 2011; Katul et al., 2012). Especially for the current version of the single-point Noah-MP-WDDM model, the concentration of  $CO_2$  is input to the model as a parameter, which may restrict the simulation performance of the model itself. When Noah-MP-WDDM is coupled to climate or atmospheric models, it may create new sources of uncertainty. The



overall underestimation under MNM-5 may be because the default parameters of the leaf carbon-nitrogen ratio ( $C : N_{leaf}$ ) in the Biome-BGC model and single-point Noah-MP-WDDM model do not match the situation of subtropical forests.

However, ~~from the statistical results (Fig. 3)~~, we can still see the variation of the simulation bias caused by different mechanisms from the statistical results (Fig. 3). Most of the simulated combinations underestimate the average dry deposition velocity, but only three mechanism combinations—BN-16, BN-26, and BN-36—overestimate it. It can be seen that the average simulation ~~deviation-bias~~ of BN-23 is the lowest among all mechanism combinations. Compared with the default BN-11 mechanism, its average ~~deviation-bias~~ is reduced from -0.0371 cm/s to -0.0185 cm/s, which reduces the relative deviation about 50.1%. At the same time, BN-13 and BN-33 achieve similar results, with a simulation bias of the dry deposition velocity of -0.0187 cm/s. Then for BN-46, the bias of dry deposition velocity is -0.0256 cm/s.

### 3.3 Implications for Diurnal Simulation of $\text{NO}_2$ Dry Deposition Velocity ~~Diurnal Simulation~~

Although the ~~trend-simulation~~-ability of the models to simulate trends is statistically weak, and the absolute difference in the average dry deposition velocity obtained from simultaneous results is small, we can still see that the model captures certain dry deposition characteristics from the daily cycle changes. Fig. 4 uses a daily variation curve to show the simulation results of the effects of each mechanism combination on the dry deposition velocity. It can be seen that for the daily variation of  $\text{NO}_2$  dry deposition velocity, different mechanisms still show considerable pattern differences.

The red line in Fig. 4 is the daily change in the observed value. Note the large fluctuation of its standard deviation, indicating a large fluctuation during the  $V_d$  observation period. This is because of the turbulent exchange caused by the fragmentation of the boundary layer inside and outside the mountain forest canopy and the effect that the change in atmospheric stability has on the turbulence (Zhang et al., 2017). The black line in Fig. 4 ~~is corresponds to experiment~~ BN-11 and the green line ~~is to~~ BN-23, respectively. It can be seen that compared to the original BN-11, the simulated  $V_d$  values of BN-23 shifts the  $V_d$  simulation upward-are increased mainly during the day. At the same time, it can be seen that the standard deviation ~~of the observations basically covers all the standard deviations of the simulation-range of the observed values can basically cover the range of the simulated~~ results. This ~~reflects-could partly reflect~~ the stability of the ~~models, which means-model, which may mean~~ that these improved mechanisms ~~should-can~~ show similar performance when transplanted to other ~~-, similar types of underlying surfaces~~ forests.

In addition, it is worth noting that some deposition observation studies believe that the  $V_d$  value at midday is the most noteworthy (Kavassalis and Murphy, 2017; Ke et al., 2020). Therefore, we also pay attention to the mechanism with the ~~smallest-simulation-deviation-minimum bias~~ at midday, which is BN-46. It can be seen that the simulated value of BN-46 is basically consistent with the  $V_d$  observation, with a bias of about 0.001 cm/s at midday.

Overall, the simulation of the daily variation of  $V_d$  presents four groups: the greatly underestimated group (represented by BN-55), the greatly overestimated group (represented by BN-26), the morning-higher and afternoon-lower pattern group (represented by BN-23), and the accurate-at-noon group (represented by BN-46). The original Noah-MP-WDDM (BN-11) belongs to the same group as BN-23 because their theoretical assumptions are consistent. The appearance of this grouping is quite interesting, because it illustrates that there are relative differences in theoretical assumptions about stomatal resistance

and nitrogen limits for photosynthesis. Therefore, in the next section we will ~~try to discuss the effects of these improved scheme groups~~ from the perspective of canopy deposition resistances with the four representative combinations and the Noah-MP-WDDM default combination (BN-11), ~~to discuss the effects of these improved scheme groups.~~

### 3.4 Comparison of Modeled Resistance Components

#### 3.4.1 Aerodynamic and Quasi-laminar Boundary Layer Resistance

~~Since the improved mechanisms are concentrated in the canopy layer, disturbances to~~ It can be seen that different mechanism improvements have relatively little impact on aerodynamic resistance ( $R_a$ ) and quasi-laminar boundary layer resistance ( $R_b$ ) ~~are relatively minor. It can be seen from Fig. 5 and 6 that the other four combinations since the improved mechanisms are concentrated in the canopy process. The four combinations of BN-11, BN-23, BN-26, and BN-46~~ are basically the same except ~~for BN-55, shown in Fig. 5 and 6.~~ The differences in  $R_a$  between BN-55 and the other four combinations are ~~mainly reflected~~ present mainly during the night, about 30 s/m, while the differences in  $R_b$  ~~occur during both day and night and~~ range about 5~10 s/m during both the day and night.

But the source of this difference for  $R_a$  and  $R_b$  is slightly different. The disturbance to  $R_a$  is indirectly caused by the calculation of ~~Mourning-Obukhov's~~ Mourning-Obukhov length ( $L$ ) and friction velocity ( $u^*$ ) in the calculation of turbulence by the sensible and latent heat flux exchange controlled by the canopy ~~stomata-stomatal~~ mechanism. The disturbance of  $R_b$  is only indirectly affected by the calculation of  $u^*$ .

In addition, it is worth noting that the diurnal variation of  $R_b$  is more consistent with the observed  $V_d$ , which echoes the hypothesis of turbulence exchange caused by the breakage of the inner and outer boundary layers of the mountain forest canopy and changes in atmospheric stability proposed by Zhang et al. (2017). ~~For this reason, we hope that in the future, the model will be able~~ The model needs to express these situations by accurately expressing the forest structure.

#### 3.4.2 Canopy Resistance

The difference in the simulation of the canopy resistance ( $R_c$ ) of each improvement scheme is the main source of the difference in the simulations of the dry deposition process, as shown in Fig. 7. It can be seen that for the consistently underestimated group represented by BN-55, the underestimation of deposition velocity comes from a large overestimation of  $R_c$ , indicating that the assumptions of these mechanisms are not suitable for subtropical forests as a whole. It is possible to draw inappropriate conclusions on such underlying surfaces from the source model results.

For BN-11 and BN-23, it can be seen that their theoretical hypotheses are the same, which can effectively reflect the physiological process of the increase in stomatal resistance caused by the closure of stomata at noon. The degree of ~~stomata-stomatal~~ reopening in the afternoon is slightly weaker, which makes the diurnal dry deposition velocity curve high in the morning and low in the afternoon. This is correct in a general sense, but there is a certain mismatch between the simulation and the observed results (low in the morning and high in the afternoon). We estimate that because the ~~sample site where the~~ flux tower of the sample site of Dinghushan is located on a westward slope, the physiological activity of the vegetation canopy is weaker in

the morning and stronger in the afternoon. This indicates that for model improvement, the parameterization of the difference between sunlit and shaded leaves should be strengthened; otherwise it will be difficult to express this phenomenon.

310 It can be seen that the theoretical hypotheses for BN-26 and BN-46 are also the same, but neither can reflect the closure of stomata at noon. The difference is reflected mainly in the intensity of the decrease in  $R_c$  during the day, and the amplitude of the disturbance to the deposition velocity is greatly enhanced when the deposition resistance is lower than 1000 s/m. It can be seen from Fig. 4 and Fig. 7 that the difference in the deposition velocity curves obtained by the simulation of BN-26 and BN-46 is not yet apparent at 07:00 in the morning. At 12:00, the difference in canopy resistance, which is only about 200 s/m  
315 lower, causes the BN-26 group to greatly overestimate deposition velocity. Under this series of mechanisms, the misestimation or disturbance of key parameters is likely to change the expected results.

## 4 Conclusions

In using Noah-MP-WDDM to study dry deposition processes, we implemented new features and applied several corrections to the code. Compared to Noah-MP-WDDM v1, the improvement of the canopy stomatal resistance mechanism and the nitrogen-  
320 limiting schemes in Noah-MP-WDDM v1.42 ~~result in much improved agreement with measurements from~~ give new options for simulating nitrogen dry deposition ~~results. Our tests for Dinghushan show that Noah-MP-WDDM v1.42 now gives a better deposition velocity simulation due to modification of the canopy stomatal resistance mechanism and the nitrogen-limiting schemes for photosynthesis.~~

~~Our results emphasize the importance of the canopy stomatal carbon dioxide compensation mechanism (Leuning, 1990) and the GPP-controlled leaf nitrogen-limiting factor (Lin et al., 2000) for the simulation of nitrogen deposition. Considering the combination of these two mechanisms (BN-23 schemes in Noah-MP-WDDM v1.42 instead of Noah-MP-WDDM v1), the average simulation bias is reduced about 50.1%.~~

velocity. Our discussion shows that the canopy ~~stomata~~ stomatal and leaf nitrogen-limiting mechanisms from various classic models cannot well express the diurnal changes in leaf canopy resistance, especially the underestimation in the daytime, by the  
330 combination of the (Yu et al., 2004) and (Thornton et al., 2002) mechanisms (BN-55) and the effect of the (Cao and Woodward, 1998) mechanism on stomatal closure (MNM-6) at noon. This may be a source of bias in the simulation of nitrogen deposition flux by these mechanisms' source models.

~~Our results emphasize the importance of the canopy stomatal carbon dioxide compensation mechanism (Leuning, 1990) and the GPP-controlled leaf nitrogen-limiting factor (Lin et al., 2000) for the simulation of nitrogen deposition. Considering the combination of these two mechanisms (BN-23 schemes in Noah-MP-WDDM v1.42 instead of Noah-MP-WDDM v1), the average simulation bias is reduced about 50.1%.~~

Our future work will focus on applying the combination of these mechanisms to the ~~simulation of regional and global~~ Noah-MP-WDDM model to simulate dry deposition for other ~~underlying~~ surface types and other components. We hope to gain a deeper understanding of simulation performance of canopy ~~stomata~~ stomatal and leaf nitrogen-limiting mechanisms for dry  
340 deposition to learn more about the response and feedback of ecosystems and nitrogen deposition.

*Code and data availability.* The current version of model is available from the project website: <https://zenodo.org/record/4756246> under the Creative Commons Attribution 4.0 International license. The exact version of the model used to produce the results used in this paper is archived on Zenodo (10.5281/zenodo.4756246), and all the simulation results are presented on Zenodo (10.5281/zenodo.4756316).

345 *Author contributions.* MC designed the research, conducted the model development, and drafted the paper. JC performed the model simulation and drafted the paper. QZ and WC did the Noah-MP-WDDM code review. GW and LW did the model output analysis. WW did the polish work. MC was supervised directly by XW during the model development work. All authors contributed to the interpretation of the results.

*Competing interests.* The authors declare that they have no conflict of interest.

350 *Acknowledgements.* This research was supported by the National Key Research and Development Plan (2017YFC0210103), National Natural Science Foundation (41705123, 41905086), [and](#) Special Fund Project for Science and Technology Innovation Strategy of Guangdong Province (Grant No.2019B121205004). Calculation for this work were supported by The High Performance Public Computing Service Platform of Jinan University. [We thank Ms. Laurel Anderton for her linguistic assistance during the preparation of this manuscript.](#)

## References

- Aber, J. D. and Federer, C. A.: A generalized, lumped-parameter model of photosynthesis, evapotranspiration and net primary production in temperate and boreal forest ecosystems, *Oecologia*, 92, 463–474, 1992.
- Aphalo, P. and Jarvis, P.: An analysis of Ball's empirical model of stomatal conductance, *Annals of Botany*, 72, 321–327, 1993.
- Ball, J. T., Woodrow, I. E., and Berry, J. A.: A model predicting stomatal conductance and its contribution to the control of photosynthesis under different environmental conditions, in: *Progress in photosynthesis research*, pp. 221–224, Springer, 1987.
- Bernhard, A.: The nitrogen cycle: Processes, players, and human impact, *Nature Education Knowledge*, 3, 25, 2012.
- Bonan, G. B.: Land-atmosphere CO<sub>2</sub> exchange simulated by a land surface process model coupled to an atmospheric general, *Journal of Geophysical Research*, 100, 2817–2831, 1995.
- Cao, M. and Woodward, F. I.: Net primary and ecosystem production and carbon stocks of terrestrial ecosystems and their responses to climate change, *Global Change Biology*, 4, 185–198, 1998.
- Chang, M., Cao, J., Ma, M., Liu, Y., Liu, Y., Chen, W., Fan, Q., Liao, W., Jia, S., and Wang, X.: Dry deposition of reactive nitrogen to different ecosystems across eastern China: A comparison of three community models, *Science of The Total Environment*, p. 137548, 2020a.
- Chang, M., Liao, W., Wang, X., Zhang, Q., Chen, W., Wu, Z., and Hu, Z.: An optimal ensemble of the Noah-MP land surface model for simulating surface heat fluxes over a typical subtropical forest in South China, *Agricultural and Forest Meteorology*, 281, 107 815, 2020b.
- Chen, W., Chen, J., and Cihlar, J.: An integrated terrestrial ecosystem carbon-budget model based on changes in disturbance, climate, and atmospheric chemistry, *Ecological Modelling*, 135, 55–79, 2000.
- Cui, J., Zhou, J., and Yang, H.: Atmospheric inorganic nitrogen in dry deposition to a typical red soil agro-ecosystem in southeastern China, *Journal of Environmental Monitoring*, 12, 1287–1294, 2010.
- Dai, Y., Dickinson, R. E., and Wang, Y.-P.: A two-big-leaf model for canopy temperature, photosynthesis, and stomatal conductance, *Journal of Climate*, 17, 2281–2299, 2004.
- Dai, Y., Yuan, H., Xin, Q., Wang, D., Shangguan, W., Zhang, S., Liu, S., and Wei, N.: Different representations of canopy structure—A large source of uncertainty in global land surface modeling, *Agricultural and Forest Meteorology*, 269, 119–135, 2019.
- De Kauwe, M., Kala, J., Lin, Y.-S., Pitman, A., Medlyn, B., Duursma, R., Abramowitz, G., Wang, Y., and Miralles, D.: A test of an optimal stomatal conductance scheme within the CABLE Land Surface Model, *Geoscientific Model Development*, 7, 6845–6891, <https://doi.org/10.5194/gmdd-7-6845-2014>, 2014.
- De Vries, W., Posch, M., Reinds, G. J., and Hettelingh, J.-P.: Quantifying relationships between N deposition and impacts on forest ecosystem services, *Progress in the modelling of critical thresholds, impacts to plant species diversity and ecosystem services in Europe*. Bilthoven, the Netherlands, Coordination Centre for Effects, Status Report, 2009, 43–53, 2009.
- Delaria, E. R. and Cohen, R. C.: A model-based analysis of foliar NO<sub>x</sub> deposition, *Atmospheric Chemistry and Physics*, 20, 2123–2141, 2020.
- Delaria, E. R., Vieira, M., Cremieux, J., and Cohen, R. C.: Measurements of NO and NO<sub>2</sub> exchange between the atmosphere and *Quercus agrifolia*, *Atmospheric Chemistry and Physics*, 18, 14 161–14 173, 2018.
- Erisman, J. W., Leach, A., Adams, M., Agboola, J. I., Ahmetaj, L., Alard, D., Austin, A., Awodun, M. A., Bareham, S., Bird, T. L., et al.: Nitrogen deposition effects on ecosystem services and interactions with other pollutants and climate change, in: *Nitrogen deposition, critical loads and biodiversity*, pp. 493–505, Springer, 2014.

- Falge, E., Reth, S., Brüggemann, N., Butterbach-Bahl, K., Goldberg, V., Oltchev, A., Schaaf, S., Spindler, G., Stiller, B., Queck, R., et al.: Comparison of surface energy exchange models with eddy flux data in forest and grassland ecosystems of Germany, *Ecological Modelling*, 188, 174–216, 2005.
- Farquhar, G., von Caemmerer, S. v., and Berry, J.: A biochemical model of photosynthetic CO<sub>2</sub> assimilation in leaves of C3 species, *Planta*, 149, 78–90, 1980.
- Finnigan, J.: Turbulence in plant canopies, *Annual Review of Fluid Mechanics*, 32, 519–571, 2000.
- 395 Finnigan, J. J., Shaw, R. H., and Patton, E. G.: Turbulence structure above a vegetation canopy, *J. Fluid Mech.*, 637, 387–424, 2009.
- Fisher, R. A. and Koven, C. D.: Perspectives on the future of land surface models and the challenges of representing complex terrestrial systems, *Journal of Advances in Modeling Earth Systems*, 12, e2018MS001453, 2020.
- Flechard, C., Nemitz, E., Smith, R., Fowler, D., Vermeulen, A., Bleeker, A., Erisman, J., Simpson, D., Zhang, L., Tang, Y., et al.: Dry deposition of reactive nitrogen to European ecosystems: a comparison of inferential models across the NitroEurope network, *Atmospheric Chemistry and Physics*, 11, 2703–2728, 2011.
- 400 Flechard, C., Massad, R.-S., Loubet, B., Personne, E., Simpson, D., Bash, J., Cooter, E., Nemitz, E., and Sutton, M.: Advances in understanding, models and parameterizations of biosphere-atmosphere ammonia exchange, *Biogeosciences*, 10, 5183–5225, 2013.
- Friedlingstein, P., Joel, G., Field, C. B., and Fung, I. Y.: Toward an allocation scheme for global terrestrial carbon models, *Global Change Biology*, 5, 755–770, 1999.
- 405 Galloway, J. N., Hiram Levy, I., and Kasibhatla, P. S.: Year 2020: Consequences of population growth and development on deposition of oxidized nitrogen, *Ambio*, pp. 120–123, 1994.
- Ganzeveld, L., Lelieveld, J., Dentener, F., Krol, M., and Roelofs, G.-J.: Atmosphere-biosphere trace gas exchanges simulated with a single-column model, *Journal of Geophysical Research: Atmospheres*, 107, ACH-8, 2002.
- Gruber, N. and Galloway, J. N.: An Earth-system perspective of the global nitrogen cycle, *Nature*, 451, 293–296, 2008.
- 410 Guerrieri, R., Lecha, L., Mattana, S., Cáliz, J., Casamayor, E. O., Barceló, A., Michalski, G., Peñuelas, J., Avila, A., and Mencuccini, M.: Partitioning between atmospheric deposition and canopy microbial nitrification into throughfall nitrate fluxes in a Mediterranean forest, *Journal of Ecology*, 108, 626–640, 2020.
- Han, X., Zhang, M., Skorokhod, A., and Kou, X.: Modeling dry deposition of reactive nitrogen in China with RAMS-CMAQ, *Atmospheric Environment*, 166, 47–61, 2017.
- 415 Horii, C. V., Munger, J. W., Wofsy, S. C., Zahniser, M., Nelson, D., and McManus, J. B.: Atmospheric reactive nitrogen concentration and flux budgets at a Northeastern US forest site, *Agricultural and Forest Meteorology*, 133, 210–225, 2005.
- Jarvis, P.: The interpretation of the variations in leaf water potential and stomatal conductance found in canopies in the field, *Philosophical Transactions of the Royal Society of London B: Biological Sciences*, 273, 593–610, 1976.
- Jefferies, R. L. and Maron, J. L.: The embarrassment of riches: atmospheric deposition of nitrogen and community and ecosystem processes, *Trends in Ecology & Evolution*, 12, 74–78, 1997.
- 420 Ji, J.: A climate-vegetation interaction model: Simulating physical and biological processes at the surface, *Journal of Biogeography*, pp. 445–451, 1995.
- Katul, G. G., Oren, R., Manzoni, S., Higgins, C., and Parlange, M. B.: Evapotranspiration: a process driving mass transport and energy exchange in the soil-plant-atmosphere-climate system, *Reviews of Geophysics*, 50, 2012.

- 425 Kavassalis, S. C. and Murphy, J. G.: Understanding ozone-meteorology correlations: A role for dry deposition, *Geophysical Research Letters*, 44, 2922–2931, <https://doi.org/https://doi.org/10.1002/2016GL071791>, <https://agupubs.onlinelibrary.wiley.com/doi/abs/10.1002/2016GL071791>, 2017.
- Ke, P., Yu, Q., Luo, Y., Kang, R., and Duan, L.: Fluxes of nitrogen oxides above a subtropical forest canopy in China, *Science of The Total Environment*, 715, 136 993, <https://doi.org/https://doi.org/10.1016/j.scitotenv.2020.136993>, <https://www.sciencedirect.com/science/article/pii/S0048969720305039>, 2020.
- 430 Landsberg, J. and Waring, R.: A generalised model of forest productivity using simplified concepts of radiation-use efficiency, carbon balance and partitioning, *Forest ecology and management*, 95, 209–228, 1997.
- Leuning, R.: Modelling stomatal behaviour and and photosynthesis of *Eucalyptus grandis*, *Functional Plant Biology*, 17, 159–175, 1990.
- Leuning, R.: A critical appraisal of a combined stomatal-photosynthesis model for C3 plants, *Plant, Cell & Environment*, 18, 339–355, 1995.
- 435 Li, L., Huang, M., Gu, F., and Zhang, L.: The Modeling Algorithms for the Effects of Nitrogen on Terrestrial Vegetation Carbon Cycle Process, *Journal of Natural Resources*, 28, 2012–2022, 2013.
- Li, Y., Schichtel, B. A., Walker, J. T., Schwede, D. B., Chen, X., Lehmann, C. M., Puchalski, M. A., Gay, D. A., and Collett, J. L.: Increasing importance of deposition of reduced nitrogen in the United States, *Proceedings of the National Academy of Sciences*, 113, 5874–5879, 2016.
- 440 Liang, X., Zhang, T., Lu, X., Ellsworth, D. S., BassiriRad, H., You, C., Wang, D., He, P., Deng, Q., Liu, H., et al.: Global response patterns of plant photosynthesis to nitrogen addition: A meta-analysis, *Glob. Change Biol*, 26, 3585–3600, 2020.
- Lin, B.-L., Sakoda, A., Shibasaki, R., Goto, N., and Suzuki, M.: Modelling a global biogeochemical nitrogen cycle in terrestrial ecosystems, *Ecological Modelling*, 135, 89–110, 2000.
- Liu, J., Chen, J., Cihlar, J., and Chen, W.: Net primary productivity distribution in the BOREAS region from a process model using satellite and surface data, *Journal of Geophysical Research: Atmospheres*, 104, 27 735–27 754, 1999.
- 445 Liu, J., Price, D. T., and Chen, J. M.: Nitrogen controls on ecosystem carbon sequestration: a model implementation and application to Saskatchewan, Canada, *Ecological Modelling*, 186, 178–195, 2005.
- Liu, L., Zhang, X., Xu, W., Liu, X., Lu, X., Wei, J., Li, Y., Yang, Y., Wang, Z., and Wong, A. Y.: Reviewing global estimates of surface reactive nitrogen concentration and deposition using satellite retrievals, *Atmospheric Chemistry and Physics*, 20, 8641–8658, 2020.
- 450 Liu, X., Zhang, Y., Han, W., Tang, A., Shen, J., Cui, Z., Vitousek, P., Erisman, J. W., Goulding, K., Christie, P., et al.: Enhanced nitrogen deposition over China, *Nature*, 494, 459–462, 2013.
- Lohammar, T., Larsson, S., Linder, S., and Falk, S.: FAST: simulation models of gaseous exchange in Scots pine, *Ecological Bulletins*, pp. 505–523, 1980.
- Makar, P., Staebler, R., Akingunola, A., Zhang, J., McLinden, C., Kharol, S., Pabla, B., Cheung, P., and Zheng, Q.: The effects of forest canopy shading and turbulence on boundary layer ozone, *Nature communications*, 8, 1–14, 2017.
- 455 Massad, R. S., Tuzet, A., Personne, E., Bedos, C., Beekmann, M., Coll, I., Drouet, J.-L., Fortems-Cheiney, A., Générmont, S., Loubet, B., et al.: Modelling Exchanges: From the Process Scale to the Regional Scale, in: *Agriculture and Air Quality*, pp. 159–207, Springer, 2020.
- McGuire, A. D., Melillo, J. M., Kicklighter, D. W., Pan, Y., Xiao, X., Helfrich, J., Moore, B., Vorosmarty, C. J., and Schloss, A. L.: Equilibrium responses of global net primary production and carbon storage to doubled atmospheric carbon dioxide: Sensitivity to changes in vegetation nitrogen concentration, *Global Biogeochemical Cycles*, 11, 173–189, 1997.
- 460



- Medlyn, B. E., Duursma, R. A., Eamus, D., Ellsworth, D. S., Prentice, I. C., Barton, C. V., Crous, K. Y., de Angelis, P., Freeman, M., and Wingate, L.: Reconciling the optimal and empirical approaches to modelling stomatal conductance, *Global Change Biology*, 17, 2134–2144, 2011.
- Monteith, J.: Solar radiation and productivity in tropical ecosystems, *Journal of applied ecology*, 9, 747–766, 1972.
- 465 Monteith, J. L. and Moss, C.: Climate and the efficiency of crop production in Britain [and discussion], *Philosophical Transactions of the Royal Society of London B: Biological Sciences*, 281, 277–294, 1977.
- Moon, K., Duff, T., and Tolhurst, K.: Sub-canopy forest winds: understanding wind profiles for fire behaviour simulation, *Fire safety journal*, 105, 320–329, 2019.
- Niu, G.-Y.: The community NOAA land-surface model (LSM) with multi-physics options, *USer Guide*, Heritage, pp. 1–21, 2011.
- 470 Niyogi, D., Alapaty, K., Raman, S., and Chen, F.: Development and evaluation of a coupled photosynthesis-based gas exchange evapotranspiration model (GEM) for mesoscale weather forecasting applications, *Journal of Applied Meteorology and Climatology*, 48, 349–368, 2009.
- Oleson, K. W., Lawrence, D. M., Gordon, B., Flanner, M. G., Kluzek, E., Peter, J., Levis, S., Swenson, S. C., Thornton, E., Feddema, J., et al.: Technical description of version 4.0 of the Community Land Model (CLM), 2010.
- 475 Peng, C., Liu, J., Dang, Q., Apps, M. J., and Jiang, H.: TRIPLEX: a generic hybrid model for predicting forest growth and carbon and nitrogen dynamics, *Ecological Modelling*, 153, 109–130, 2002.
- Phillips, S. B., Aneja, V. P., Kang, D., and Arya, S. P.: Modelling and analysis of the atmospheric nitrogen deposition in North Carolina, *International journal of global environmental issues*, 6, 231–252, 2006.
- Place, B. K., Delaria, E. R., Liu, A. X., and Cohen, R. C.: Leaf Stomatal Control over Acyl Peroxynitrate Dry Deposition to Trees, *ACS*
- 480 *Earth and Space Chemistry*, 4, 2162–2170, 2020.
- Schulz, M., Prospero, J. M., Baker, A. R., Dentener, F., Ickes, L., Liss, P. S., Mahowald, N. M., Nickovic, S., García-Pando, C. P., Rodríguez, S., et al.: Atmospheric transport and deposition of mineral dust to the ocean: implications for research needs, *Environmental Science & Technology*, 46, 10 390–10 404, 2012.
- Seinfeld, J. H. and Pandis, S. N.: *Atmospheric chemistry and physics: from air pollution to climate change*, John Wiley & Sons, 2012.
- 485 Simpson, D., Benedictow, A., Berge, H., Bergström, R., Emberson, L. D., Fagerli, H., Flechard, C. R., Hayman, G. D., Gauss, M., Jonson, J. E., et al.: The EMEP MSC-W chemical transport model–technical description, *Atmospheric Chemistry and Physics*, 12, 7825–7865, 2012.
- Stevens, C. J., Dise, N. B., Mountford, J. O., and Gowing, D. J.: Impact of nitrogen deposition on the species richness of grasslands, *Science*, 303, 1876–1879, 2004.
- 490 Szinyei, D.: Modelling and evaluation of ozone dry deposition, Ph.D. thesis, Freie Universität Berlin, 2015.
- Thornton, P., Law, B., Gholz, H. L., Clark, K. L., Falge, E., Ellsworth, D., Goldstein, A., Monson, R., Hollinger, D., Falk, M., et al.: Modeling and measuring the effects of disturbance history and climate on carbon and water budgets in evergreen needleleaf forests, *Agricultural and forest meteorology*, 113, 185–222, 2002.
- Tian, D., Du, E., Jiang, L., Ma, S., Zeng, W., Zou, A., Feng, C., Xu, L., Xing, A., Wang, W., Zheng, C., Ji, C., Shen, H., and
- 495 Fang, J.: Responses of forest ecosystems to increasing N deposition in China: A critical review, *Environmental Pollution*, 243, 75–86, <https://doi.org/https://doi.org/10.1016/j.envpol.2018.08.010>, <https://www.sciencedirect.com/science/article/pii/S0269749118320165>, 2018.

- Tian, H., Liu, M., Zhang, C., Ren, W., Xu, X., Chen, G., Lv, C., and Tao, B.: The Dynamic Land Ecosystem Model (DLEM) for simulating terrestrial processes and interactions in the context of multifactor global change, *Acta Geographica Sinica*, 65, 1027–1047, 2010.
- 500 Wang, W., Ganzeveld, L., Rossabi, S., Hueber, J., and Helmig, D.: Measurement report: Leaf-scale gas exchange of atmospheric reactive trace species (NO<sub>2</sub>, NO, O<sub>3</sub>) at a northern hardwood forest in Michigan, *Atmospheric Chemistry and Physics*, 20, 11 287–11 304, 2020.
- Wesely, M.: Parameterization of surface resistances to gaseous dry deposition in regional-scale numerical models, *Atmospheric Environment* (1967), 23, 1293–1304, 1989.
- Wolfe, G. and Thornton, J.: The chemistry of atmosphere-forest exchange (CAFÉ) model–Part 1: Model description and characterization, 505 *Atmospheric Chemistry and Physics*, 11, 77–101, 2011.
- Woodward, F. I., Smith, T. M., and Emanuel, W. R.: A global land primary productivity and phytogeography model, *Global biogeochemical cycles*, 9, 471–490, 1995.
- Wu, Z., Wang, X., Chen, F., Turnipseed, A. A., Guenther, A. B., Niyogi, D., Charusombat, U., Xia, B., Munger, J. W., and Alapaty, K.: Evaluating the calculated dry deposition velocities of reactive nitrogen oxides and ozone from two community models over a temperate 510 deciduous forest, *Atmospheric Environment*, 45, 2663–2674, 2011.
- Wu, Z., Wang, X., Turnipseed, A. A., Chen, F., Zhang, L., Guenther, A. B., Karl, T., Huey, L., Niyogi, D., Xia, B., et al.: Evaluation and improvements of two community models in simulating dry deposition velocities for peroxyacetyl nitrate (PAN) over a coniferous forest, *Journal of Geophysical Research: Atmospheres*, 117, 2012.
- Wu, Z., Schwede, D. B., Vet, R., Walker, J. T., Shaw, M., Staebler, R., and Zhang, L.: Evaluation and Intercomparison of Five North 515 American Dry Deposition Algorithms at a Mixed Forest Site, *Journal of Advances in Modeling Earth Systems*, 10, 1571–1586, <https://doi.org/https://doi.org/10.1029/2017MS001231>, <https://agupubs.onlinelibrary.wiley.com/doi/abs/10.1029/2017MS001231>, 2018.
- Xu, G.-L., Schleppi, P., Li, M.-H., and Fu, S.-L.: Negative responses of Collembola in a forest soil (Alptal, Switzerland) under experimentally increased N deposition, *Environmental Pollution*, 157, 2030–2036, 2009.
- Yang, R. and Friedl, M. A.: Modeling the effects of three-dimensional vegetation structure on surface radiation and energy balance in boreal 520 forests, *Journal of Geophysical Research: Atmospheres*, 108, 2003.
- Yang, Z.-L., Niu, G.-Y., Mitchell, K. E., Chen, F., Ek, M. B., Barlage, M., Longuevergne, L., Manning, K., Niyogi, D., Tewari, M., et al.: The community Noah land surface model with multiparameterization options (Noah-MP): 2. Evaluation over global river basins, *Journal of Geophysical Research: Atmospheres*, 116, 2011.
- Ye, Z.-P. and Yu, Q.: Comparison of new and several classical models of photosynthesis in response to irradiance, *Chinese Journal of Plant 525 Ecology*, 32, 1356, 2008.
- Yongjiu, D. and Qingcun, Z.: A land surface model (IAP94) for climate studies part I: Formulation and validation in off-line experiments, *Advances in Atmospheric Sciences*, 14, 433–460, 1997.
- Yu, G., Jia, Y., He, N., Zhu, J., Chen, Z., Wang, Q., Piao, S., Liu, X., He, H., Guo, X., et al.: Stabilization of atmospheric nitrogen deposition in China over the past decade, *Nature Geoscience*, 12, 424–429, 2019.
- 530 Yu, Q., Zhang, Y., Liu, Y., and Shi, P.: Simulation of the stomatal conductance of winter wheat in response to light, temperature and CO<sub>2</sub> changes, *Annals of Botany*, 93, 435–441, 2004.
- Zhang, L., Brook, J., and R, V.: A revised parameterization for gaseous dry deposition in air-quality models, *Atmospheric Chemistry and Physics*, 3, <https://doi.org/10.5194/acpd-3-1777-2003>, 2003.

- 535 Zhang, Q., Chang, M., Zhou, S., Chen, W., Wang, X., Liao, W., Dai, J., and Wu, Z.: Evaluate dry deposition velocity of the nitrogen oxides  
using Noah-MP physics ensemble simulations for the Dinghushan Forest, Southern China, *Asia-Pacific Journal of Atmospheric Sciences*,  
53, 519–536, 2017.
- Zhao, Y., Zhang, L., Chen, Y., Liu, X., Xu, W., Pan, Y., and Duan, L.: Atmospheric nitrogen deposition to China: A model analysis on  
nitrogen budget and critical load exceedance, *Atmospheric Environment*, 153, 32–40, 2017.
- 540 Zheng, S. and Shangguan, Z.: Photosynthetic characteristics and their relationships with leaf nitrogen content and leaf mass per area in  
different plant functional types, *Acta Ecologica Sinica*, 1, 2134–2144, 2007.
- Zhong, B., Wang, X., Ye, L., Ma, M., Jia, S., Chen, W., Yan, F., Wen, Z., and Padmaja, K.: Meteorological variations impeded the benefits  
of recent NO<sub>x</sub> mitigation in reducing atmospheric nitrate deposition in the Pearl River Delta region, Southeast China, *Environmental  
Pollution*, 266, 115 076, 2020.

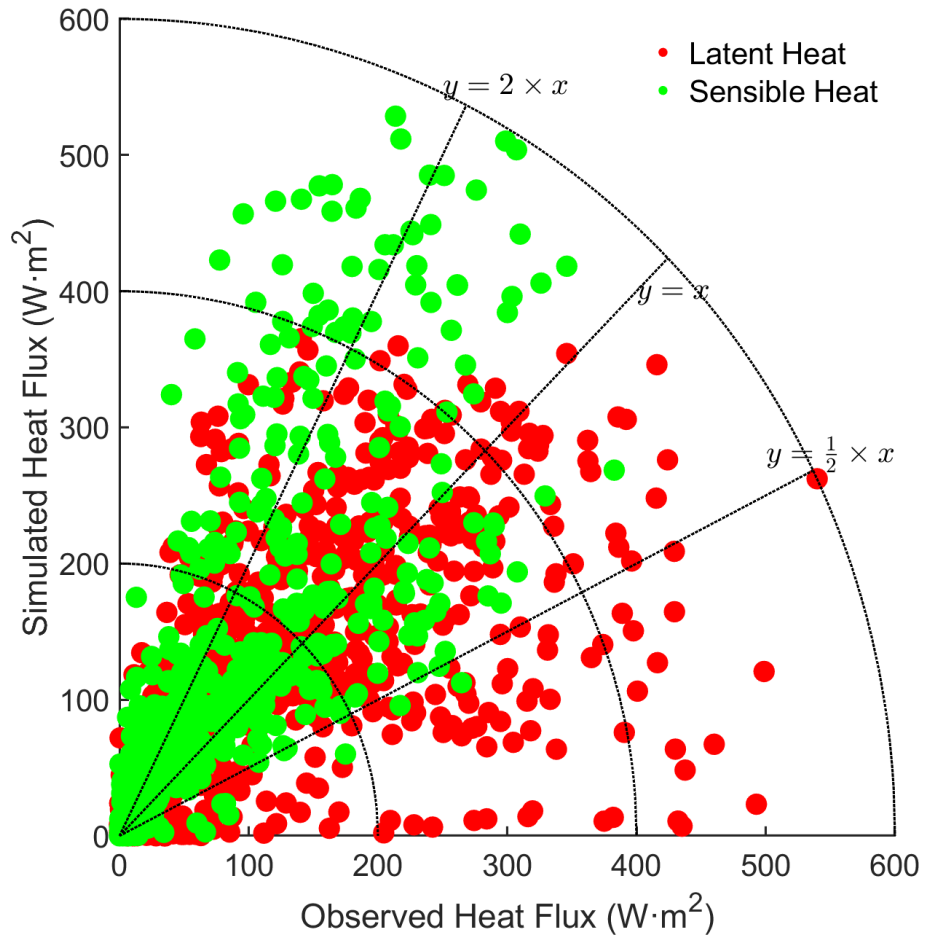

**Figure 1.** Comparison of observed and simulated fluxes of latent heat and sensible heat

Improved-mechanism-evaluation-experiment-scheme-design MNM-1 MNM-2 MNM-3 MNM-4 MNM-5 MNM-6 MBM-1  
 545 BN-11\*BN-12 BN-13 BN-14 BN-15 BN-16 MBM-2 BN-21 BN-22 BN-23 BN-24 BN-25 BN-26 MBM-3 BN-31 BN-32  
 BN-33 BN-34 BN-35 BN-36 MBM-4 BN-41 BN-42 BN-43 BN-44 BN-45 BN-46 MBM-5 BN-51 BN-52 BN-53 BN-54  
 BN-55 BN-56 MBM-6 BN-61 BN-62 BN-63 BN-64 BN-65 BN-66 MBM-7 BN-71 BN-72 BN-73 BN-74 BN-75 BN-76

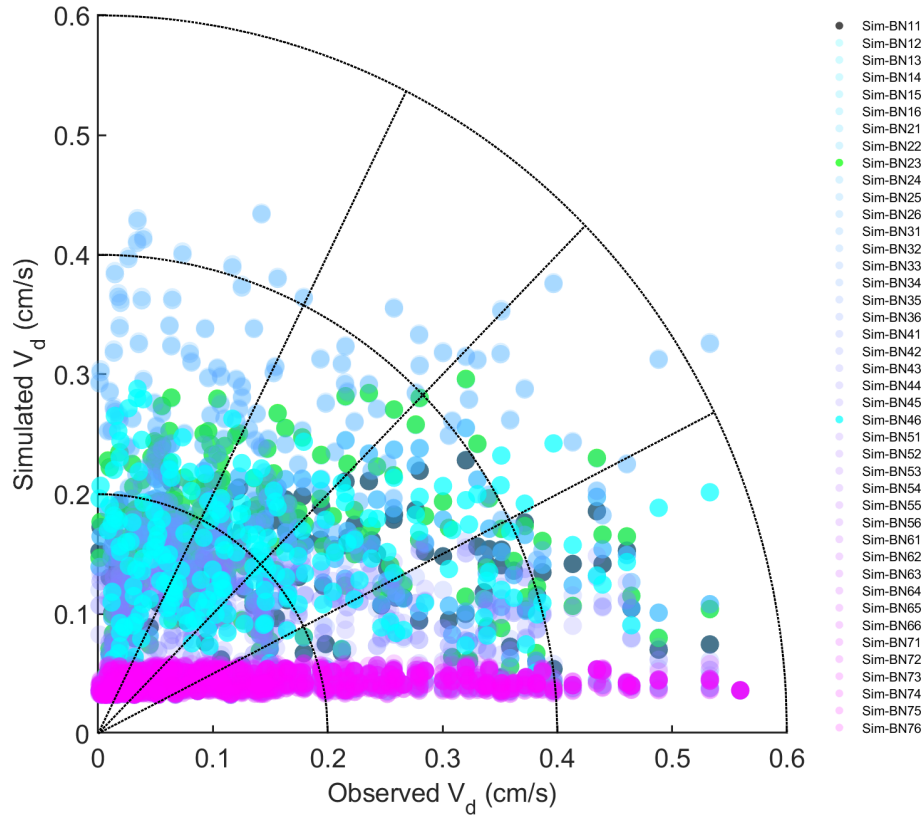

**Figure 2.** Comparison of observed and simulated  $V_d$  of  $NO_2$

**Table 1.** The coupled stomatal conductance and resistance equation lists

| Experiment code | Mechanism equation*                                                                                                                                                            | Reference                |
|-----------------|--------------------------------------------------------------------------------------------------------------------------------------------------------------------------------|--------------------------|
| MBM-1           | $g_s = \frac{1}{R_s} = m \times \frac{A}{C_{air}} \times \frac{e_{air}}{e_{sat}(T_v)} \times P_{air} + g_{min}$                                                                | Ball et al. (1987)       |
| MBM-2           | $g_s = g_0 + a \cdot A_n \frac{RH}{C_s - \Gamma^*}$                                                                                                                            | Leuning (1990)           |
| MBM-3           | $g_s = \frac{A_n \times RH}{C_s} [k_0 + k_1 \times D + k_2 \times T_1 + k_3 \times T_1 \times D]$                                                                              | Aphalo and Jarvis (1993) |
| MBM-4           | $g_s = g_0 + a \cdot \frac{A_n}{(1 + \frac{D}{D_0}) \cdot (C_s - \Gamma^*)}$                                                                                                   | Leuning (1995)           |
| MBM-5           | $g_s = a \cdot \frac{V_{cmax} \alpha Q \eta}{V_{cmax} \alpha Q + V_{cmax} \eta C_a + \alpha Q \eta C_a} \cdot \frac{1}{1 + D/D_0} \cdot \frac{\psi - \psi_0}{\psi_m - \psi_0}$ | Yu et al. (2004)         |
| MBM-6           | $g_s = g_0 + \frac{1}{4\eta} \cdot \frac{A_{net}}{C_a - C_i} \cdot f(RH, T_L)$                                                                                                 | Ye and Yu (2008)         |
| MBM-7           | $g_s = g_0 + 1.6 \cdot (1 + \frac{g_1 \beta}{\sqrt{D}}) \frac{A}{C_s}$                                                                                                         | Medlyn et al. (2011)     |

\*, For the symbols in the mechanism equations, please refer to the source literature

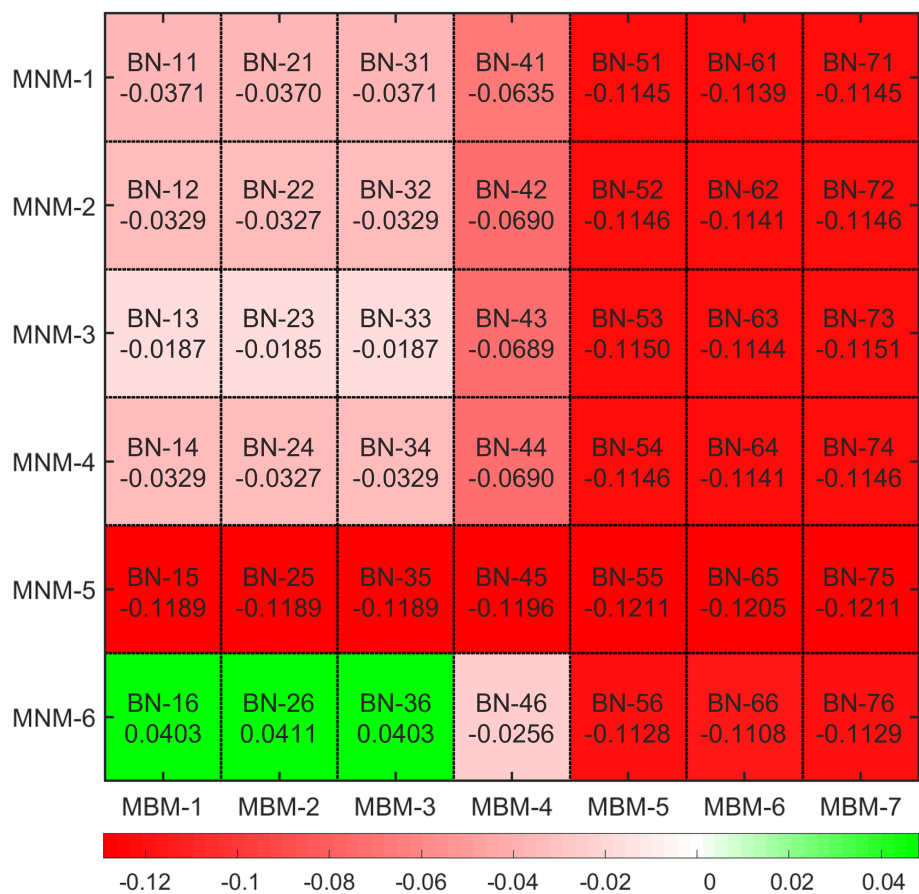

**Figure 3.** Mean bias of observed and simulated  $V_d$

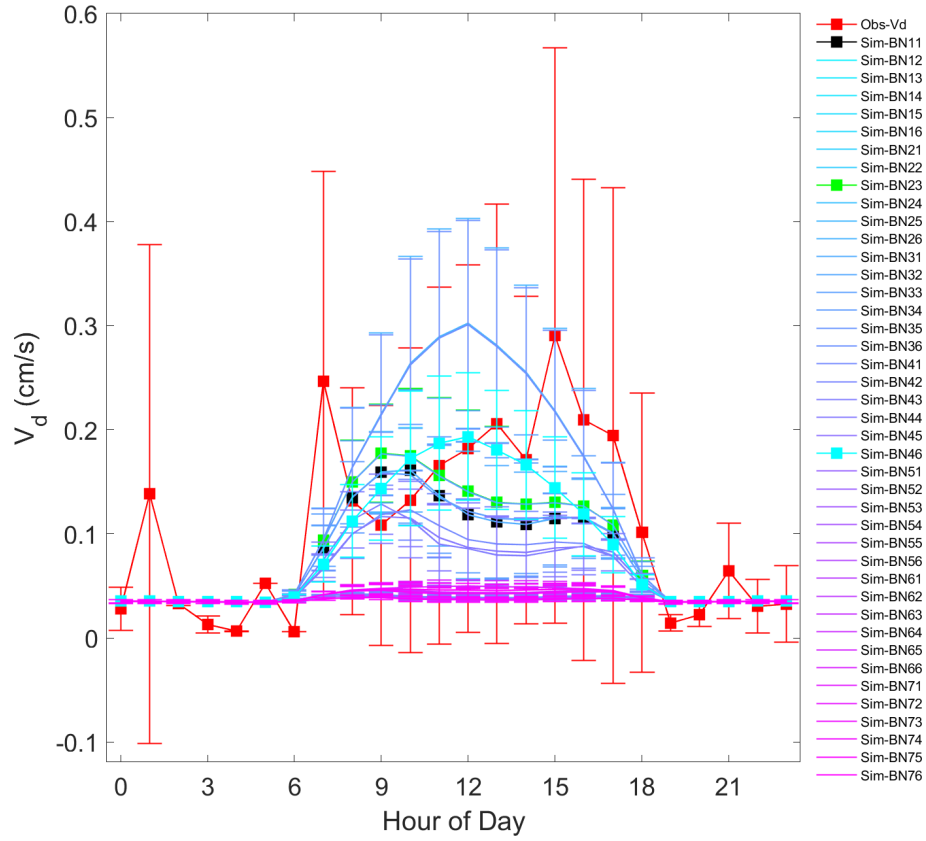

**Figure 4.** Diurnal variation of observed and simulated  $V_d$



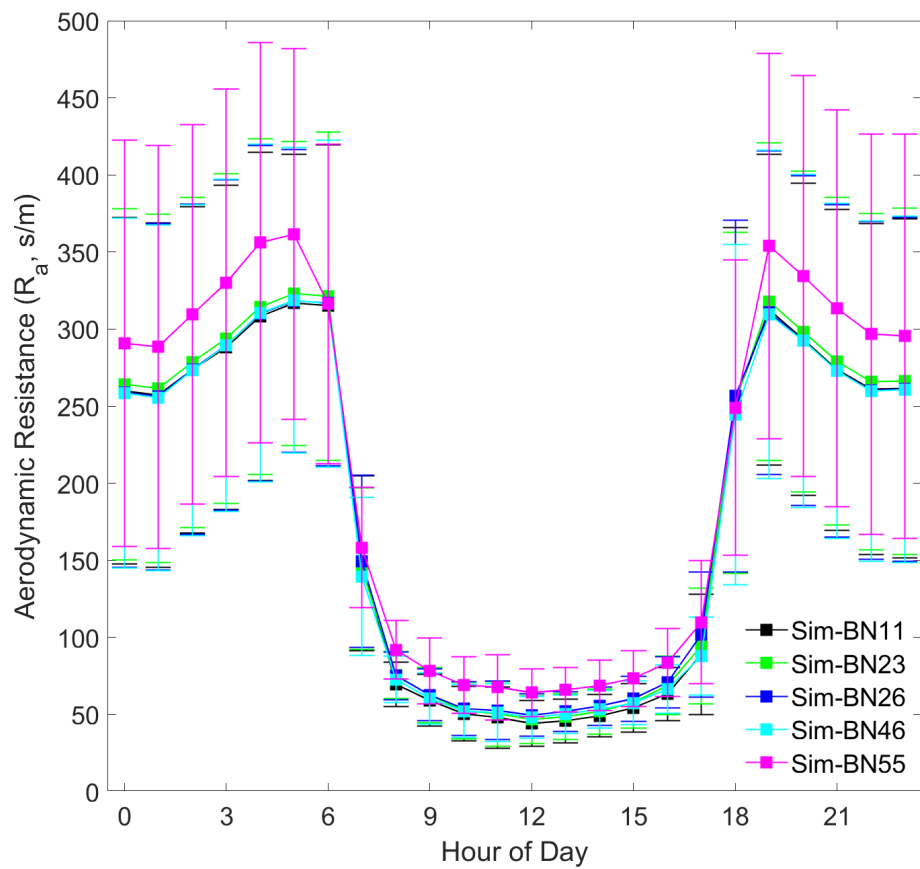

**Figure 5.** Diurnal variation of simulated  $R_a$

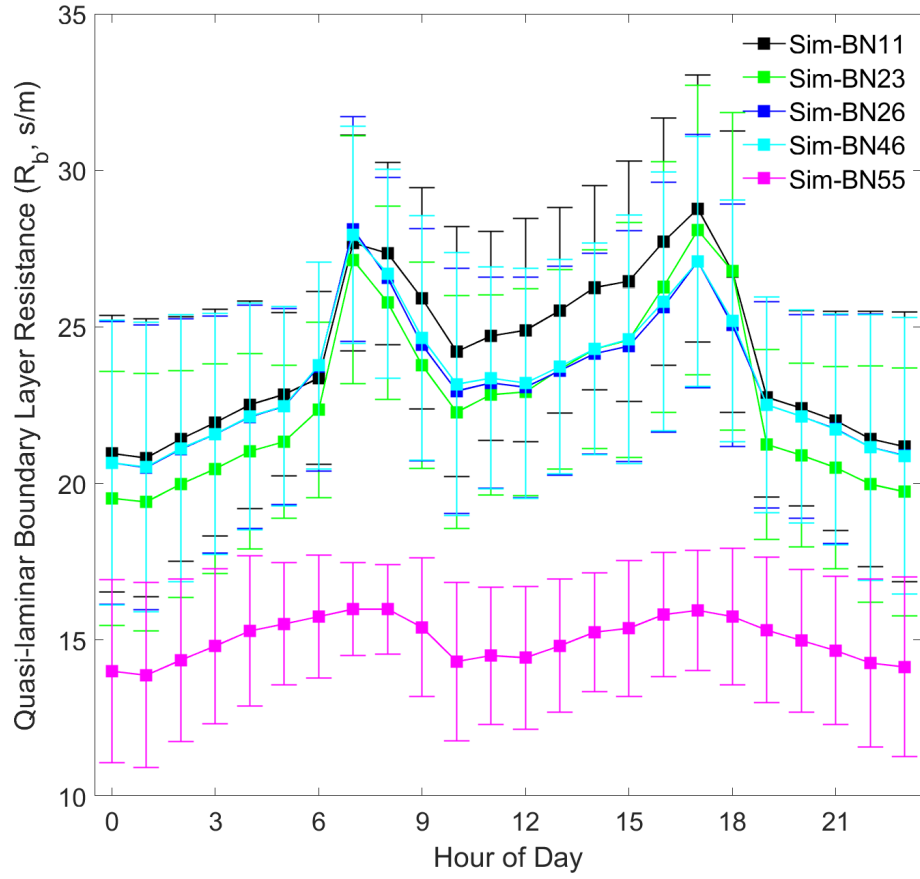

**Figure 6.** Diurnal variation of simulated  $R_b$

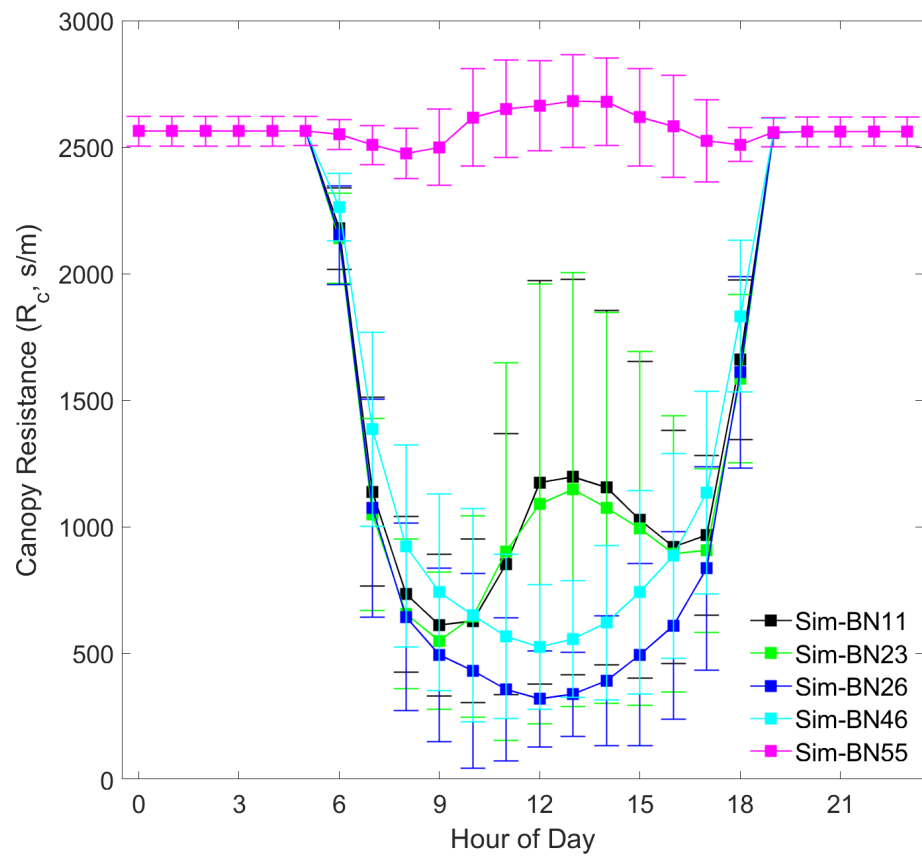

**Figure 7.** Diurnal variation of simulated  $R_c$

**Table 2.** Nitrogen limits schemes for the photosynthesis mechanism

| Experiment code | Classify | Mechanism equation*                                                                                                         | Source models                      |
|-----------------|----------|-----------------------------------------------------------------------------------------------------------------------------|------------------------------------|
| MNM-1           | Implicit | $v_{cm} = f(N) \cdot V_{cmax}$<br>$f(N) \in [0, 1]$                                                                         | Noah-MP, Noah-LSM<br>CLM4.0, AVMIN |
| MNM-2           | Implicit | $v_{cm} = f(N) \cdot V_{cmax}$<br>$f(N) = B_L \cdot B_{Vmax}$                                                               | IBIS, InTEC<br>BEPS, DLEM          |
| MNM-3           | Implicit | $GPP = f_{GPP,N} \cdot f_{GPP,others} \cdot GPP_{max}$<br>$f(GPP, N) = \frac{N_{av}}{k + N_{av}}$                           | Lin et al. (2000)                  |
| MNM-4           | Implicit | $GPP = f_{GPP,N} \cdot f_{GPP,others} \cdot GPP_{max}$<br>$f(GPP, N) = \min(1.0, \frac{N_{av}}{\frac{NPP_{max}}{B_{max}}})$ | TRIRLEX, 3-PG                      |
| MNM-5           | Explicit | $v_{cm} = \frac{act \cdot f_{lir}}{f_{lir} \cdot SLA \cdot C:N_{leaf}}$                                                     | Biome-BGC                          |
| MNM-6           | Explicit | $v_{cm} = \frac{(A_b + R_d[P_c + K_c(1 + \frac{P_0}{K_0})])}{P_c - 0.5P_0/\tau}$<br>$A_b = \frac{190 \cdot n}{360 + n}$     | CEVSA, Doly                        |

\*, For the symbols in the mechanism equations, please refer to the source literature

**Table 3.** Statistical results of original simulated values and observed values

| Evaluation criteria                   | Latent heat flux | Sensible heat flux |
|---------------------------------------|------------------|--------------------|
| Mean Observation                      | 66.42            | 29.81              |
| Mean Simulation                       | 65.20            | 48.55              |
| Mean Bias                             | -0.14            | 20.18              |
| Mean Absolute Percentage Error (MAPE) | 2.36             | 3.12               |
| Root Mean Square Error (RMSE)         | 82.29            | 60.64              |
| Correlation Coefficient (R)           | 0.68             | 0.84               |
